# Supplementary material for: Artificial intelligence-aiding lab-on-a-chip workforce designed oral [3.1.0] bi and [4.2.0] tricyclic catalytic interceptors inhibiting multiple SARS-CoV-2 protomers assisted by double-shell deep learning
Source: Royal Society of Chemistry journal article supplement (doi:10.1039/d4ra03965c), 2024-01-01
Supplement: d4ra03965c1.pdf [file d4ra03965c1.pdf]

## Supplementary Information

### Artificial Intelligence-Aiding Lab-on-a-Chip Workforce Designed Oral [3.1.0] Bi and [4.2.0] Tricyclic Catalytic Interceptors Inhibiting Multiple SARS-CoV-2 Protomers Assisted by Double- Shell Deep Learnings

Surachate Kalasin<sup>a\*</sup>, Werasak Surareungchai<sup>a,b,c,d</sup>

<sup>a</sup>Faculty of Science and Nanoscience & Nanotechnology Graduate Program, King Mongkut's  
University of Technology Thonburi, 10140, Bangkok, Thailand

<sup>b</sup>Pilot Plant Research and Development Laboratory, King Mongkut's University of Technology  
Thonburi, 10150, Bangkok, Thailand

<sup>c</sup>School of Bioresource and Technology, King Mongkut's University of Technology Thonburi,  
10150, Bangkok, Thailand

<sup>d</sup>Analytical Sciences and National Doping Test Institute, Mahidol University, Bangkok 10400,  
Thailand

\*Corresponding author: Surachate Kalasin, E-mail: surachate.kal@kmutt.ac.th

ORCID:0000-0001-6413-6642

## Table of Contents

**Figure S1:** System-level lab onchip with shared memory model.

**Figure S2:** An example of GNN-output of SARS-CoV-2 inhibiting candidates.

**Figure S3:** 3D-Interpolated charge representation of different SARS-CoV-2 protein targets.

**Figure S4:** Conformation of **KS** compounds onto an active site of SARS-CoV-2 Mpro.

**Figure S5:** The atom index in the **KS1** inhibitor with force field parameters.

**Figure S6:** Nomenclature of contemporary SARS-CoV-2 inhibitors.

**Figure S7:** An example of the optimum DNN-output of **KS1** compound.

**Figure S8:** Zoomed-in simulated **KS2** compound transported into a S-protein pocket gate.

**Figure S9:** The atom index in the **KS2** inhibitor with force field parameters.

**Figure S10:** Ramachandran diagram of unligated SARS-CoV-2 complex.

**Figure S11:** Precision-recall during allosteric docking classification of bicyclic **KS1** compound.

**Figure S12:** Snapshot of wearable lab onchip.

**Figure S13:** List of main **KS** inhibitors with their SMILES string.

**Figure S14:** List of main **KS** inhibiting analogs.

**Video S1:** Simulated [3.1.0] bicyclic **KS1** inhibitor.

**Video S2:** Simulated [4.2.0] tricyclic **KS2** inhibitor.

**Video S3:** Demonstration of lab onchip activation.

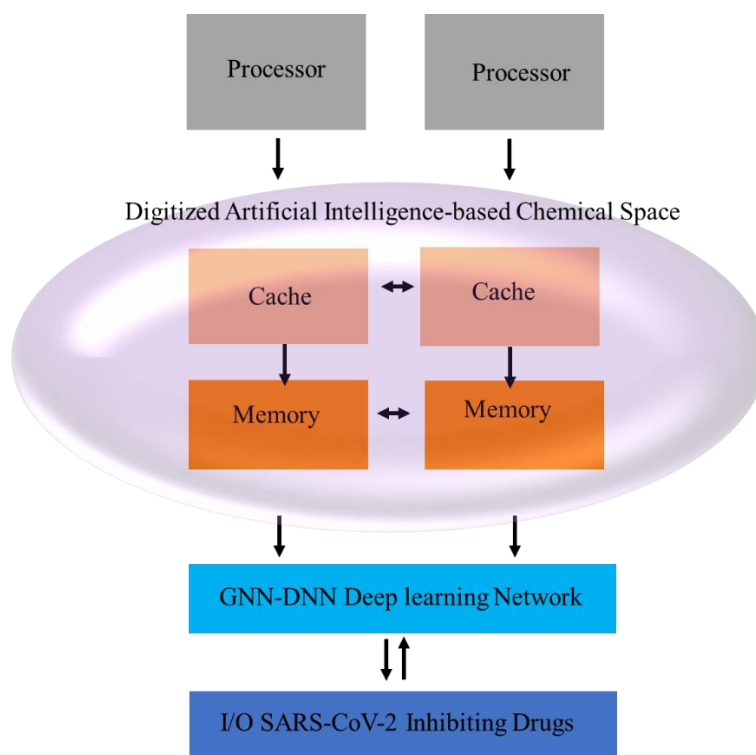

Dual-core processors allow cache coherency circuitry to operate at a higher clock rate, providing better performance in finding an inhibitor in the artificial intelligence-based chemical space. In this homogeneous architecture (two identical processors), they break up the overall computations, in which one MCU designs an inhibitor using GNN deep learning and another MCU predicts docking scores. The cache exploitation in the dual core is shared between cores, which increases cache access time, allowing a higher chance to access memory, which enhances execution and performance.

**Figure S1.** System-level lab onchip with shared memory model



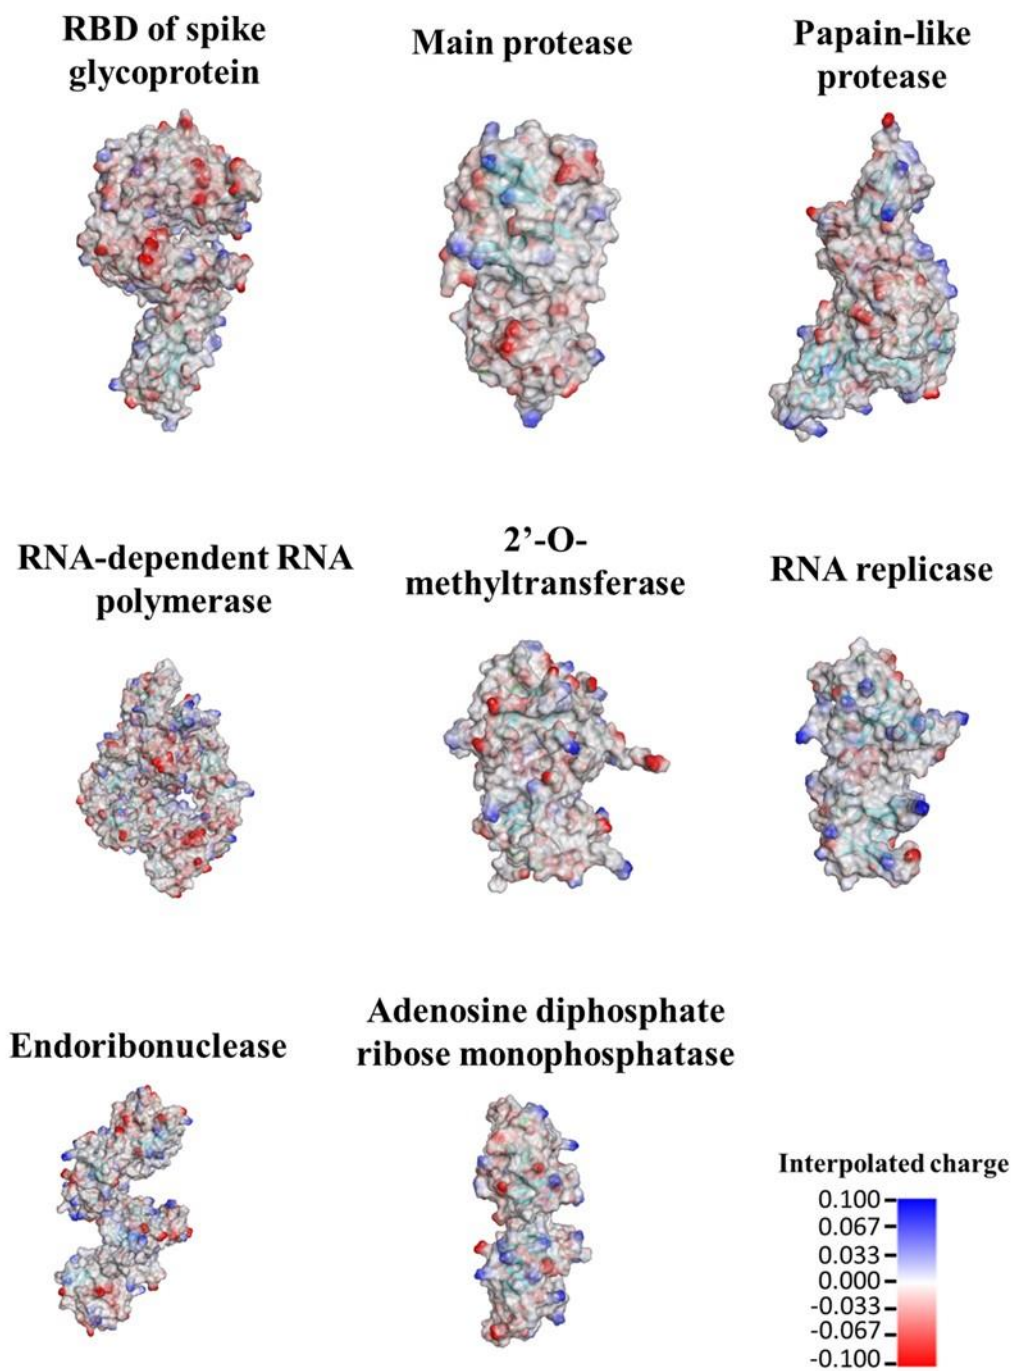

**Figure S3.** 3D-Interpolated charge representation of different SARS-CoV-2 protein targets.

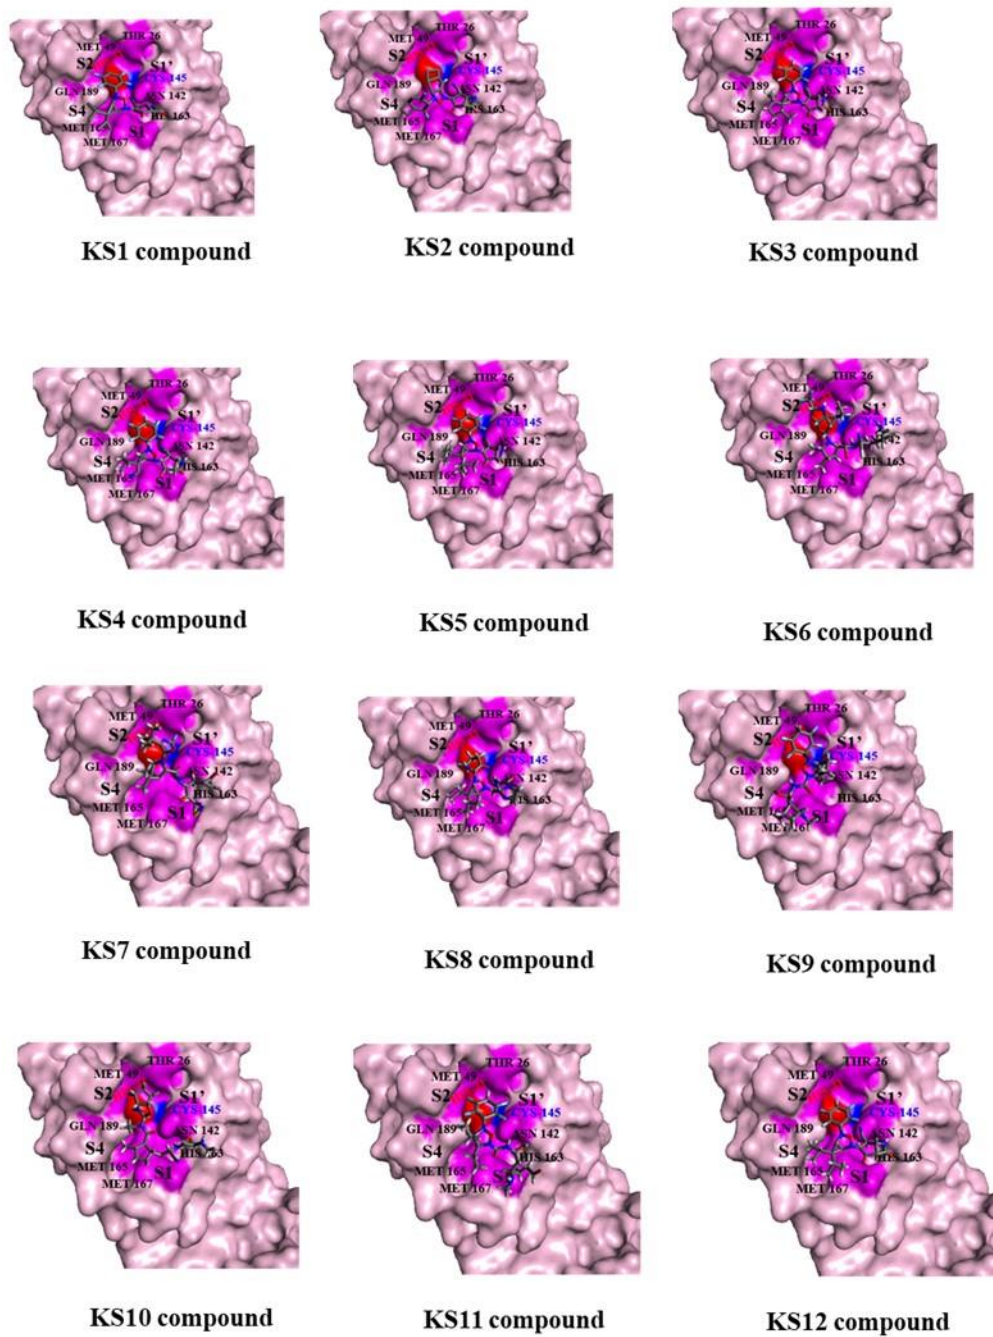

**Figure S4.** Conformation of **KS** compounds on a selected CYS145 and HIS41 catalytic dyad site of SARS-CoV-2 main protease using METEORITE process.



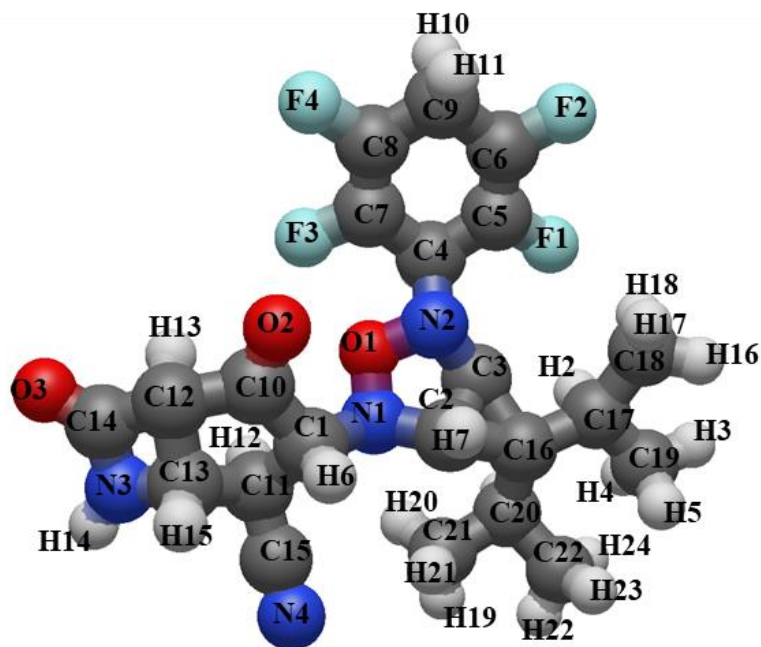

Nonbonded parameters for all atom types simulated in the molecular dynamic simulation.

| Located atom | Atomic number | Mass    | $\sigma$ (nm) | $\epsilon$ (kJ/mol) |
|--------------|---------------|---------|---------------|---------------------|
| CR           | 6             | 12.011  | 0.387541      | 0.23012             |
| NR           | 7             | 14.0067 | 0.329632      | 0.8368              |
| CR3R         | 6             | 12.011  | 0.333196      | 0.589944            |
| OR           | 8             | 15.9994 | 0.315378      | 0.636386            |
| C=C          | 6             | 12.011  | 0.372396      | 0.284512            |
| F            | 9             | 18.9984 | 0.290433      | 0.56484             |
| C=O          | 6             | 12.011  | 0.356359      | 0.46024             |
| CR4R         | 6             | 12.011  | 0.333196      | 0.589944            |
| NC=O         | 7             | 14.0067 | 0.329632      | 0.8368              |
| O=C          | 8             | 15.9994 | 0.302905      | 0.50208             |
| CSP          | 6             | 12.011  | 0.370614      | 0.284512            |
| NSP          | 7             | 14.0067 | 0.329632      | 0.8368              |
| HCMM         | 1             | 1.0079  | 0.235197      | 0.092048            |
| HNCO         | 1             | 1.0079  | 0.040001      | 0.192464            |

Bonded parameters for all atom types simulated in the molecular dynamic simulation.

| Paired atom |      | $d_{eq}$ (nm) | $k_b$ (kJ mol <sup>-1</sup> nm <sup>-2</sup> ) |
|-------------|------|---------------|------------------------------------------------|
| CR          | CR   | 0.338541      | 0.04184                                        |
| CR          | NR   | 0.334087      | 0.187114                                       |
| CR          | CR3R | 0.335869      | 0.157109                                       |
| CR          | OR   | 0.32696       | 0.163176                                       |
| CR          | C=C  | 0.355469      | 0.109105                                       |
| CR          | F    | 0.314487      | 0.15373                                        |
| CR          | C=O  | 0.34745       | 0.138768                                       |
| CR          | CR4R | 0.335869      | 0.157109                                       |
| CR          | NC=O | 0.334087      | 0.187114                                       |
| CR          | O=C  | 0.293997      | 0.144938                                       |
| CR          | CSP  | 0.354578      | 0.109105                                       |
| CR          | NSP  | 0.334087      | 0.187114                                       |
| CR          | HCMM | 0.286869      | 0.062059                                       |
| CR          | HNCO | 0.189271      | 0.089737                                       |
| O=C         | NR   | 0.289542      | 0.648182                                       |
| O=C         | CR3R | 0.291324      | 0.544242                                       |
| O=C         | OR   | 0.282415      | 0.565258                                       |
| O=C         | C=C  | 0.310924      | 0.377952                                       |
| O=C         | F    | 0.269942      | 0.532536                                       |
| O=C         | C=O  | 0.302905      | 0.480705                                       |
| O=C         | CR4R | 0.291324      | 0.544242                                       |
| O=C         | NC=O | 0.289542      | 0.648182                                       |
| O=C         | O=C  | 0.249452      | 0.50208                                        |
| O=C         | CSP  | 0.310033      | 0.377952                                       |
| O=C         | NSP  | 0.289542      | 0.648182                                       |
| O=C         | HCMM | 0.242324      | 0.214978                                       |
| O=C         | HNCO | 0.144726      | 0.310857                                       |

| Triple-atom angle | $k_\theta$ (kJ mol <sup>-1</sup> rad <sup>-2</sup> ) | $\theta_{eq}$ (deg) |
|-------------------|------------------------------------------------------|---------------------|
| N-C-C             | 720.84                                               | 105.8370            |
| C-C-F             | 655.81                                               | 119.1000            |
| N-C-O             | 546.20                                               | 127.1520            |
| N-O-N             | 722.65                                               | 109.5000            |

| Dihedral angles | kJ mol <sup>-1</sup> | $\psi$ |
|-----------------|----------------------|--------|
| C-C-C-F         | 12.0416              | 0      |
| C-C-C-O         | 78.2910              | 0      |
| N-C-C-H         | -12.0416             | 180    |

**Figure S5.** The atom index in the **KS1** inhibitor with bonded and nonbonded force parameters.



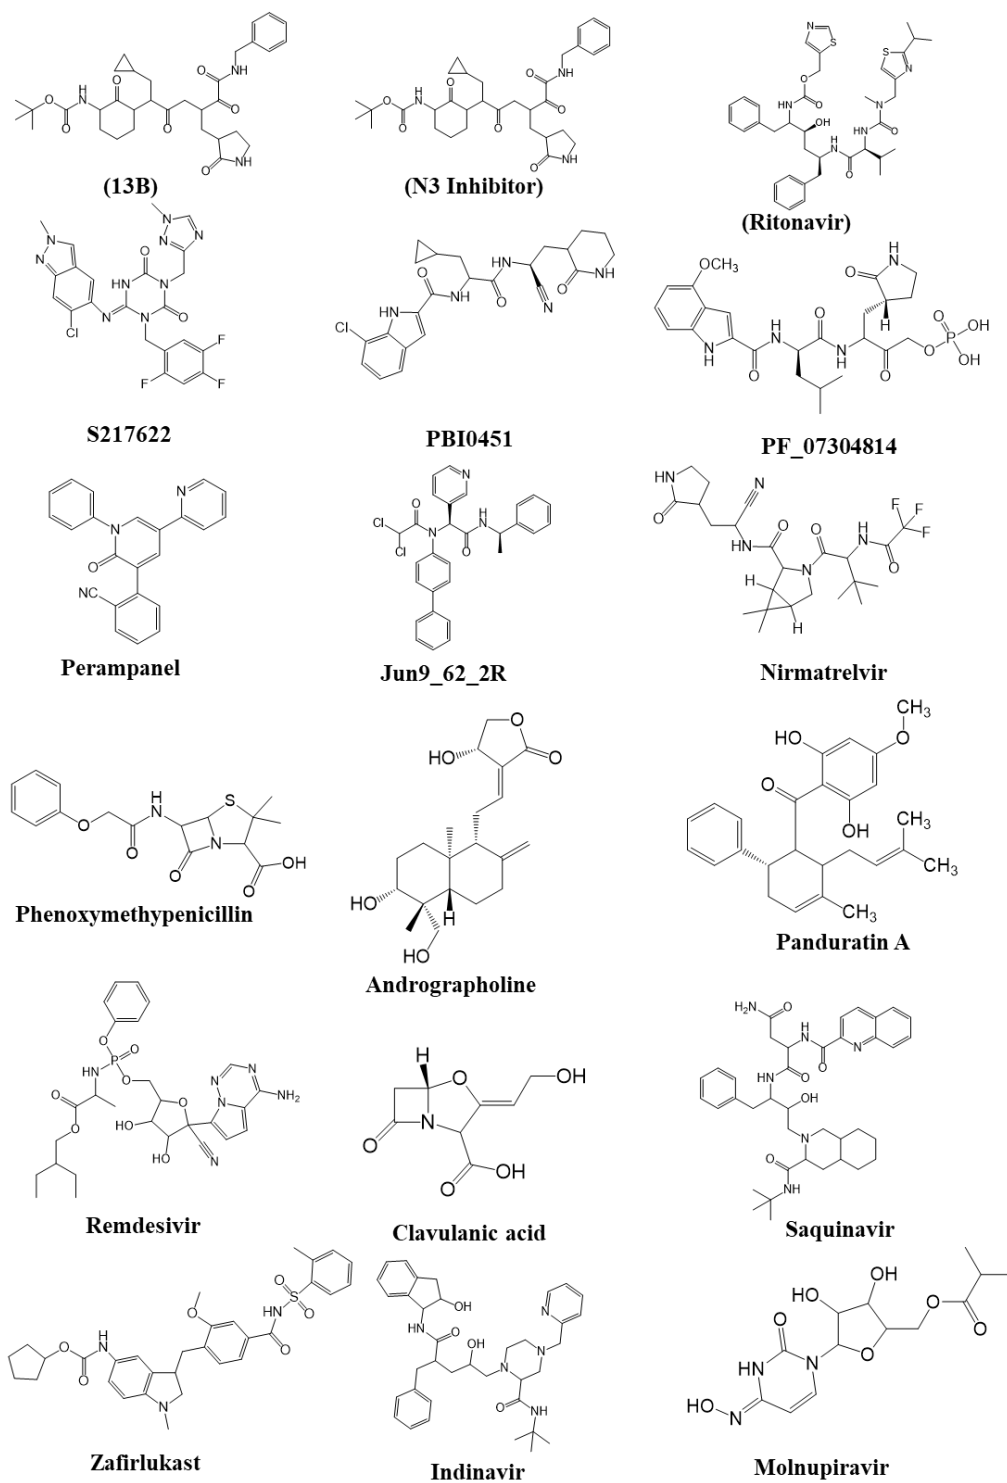

**Figure S6.** Nomenclature of contemporary SARS-CoV-2 inhibitors used in the study.

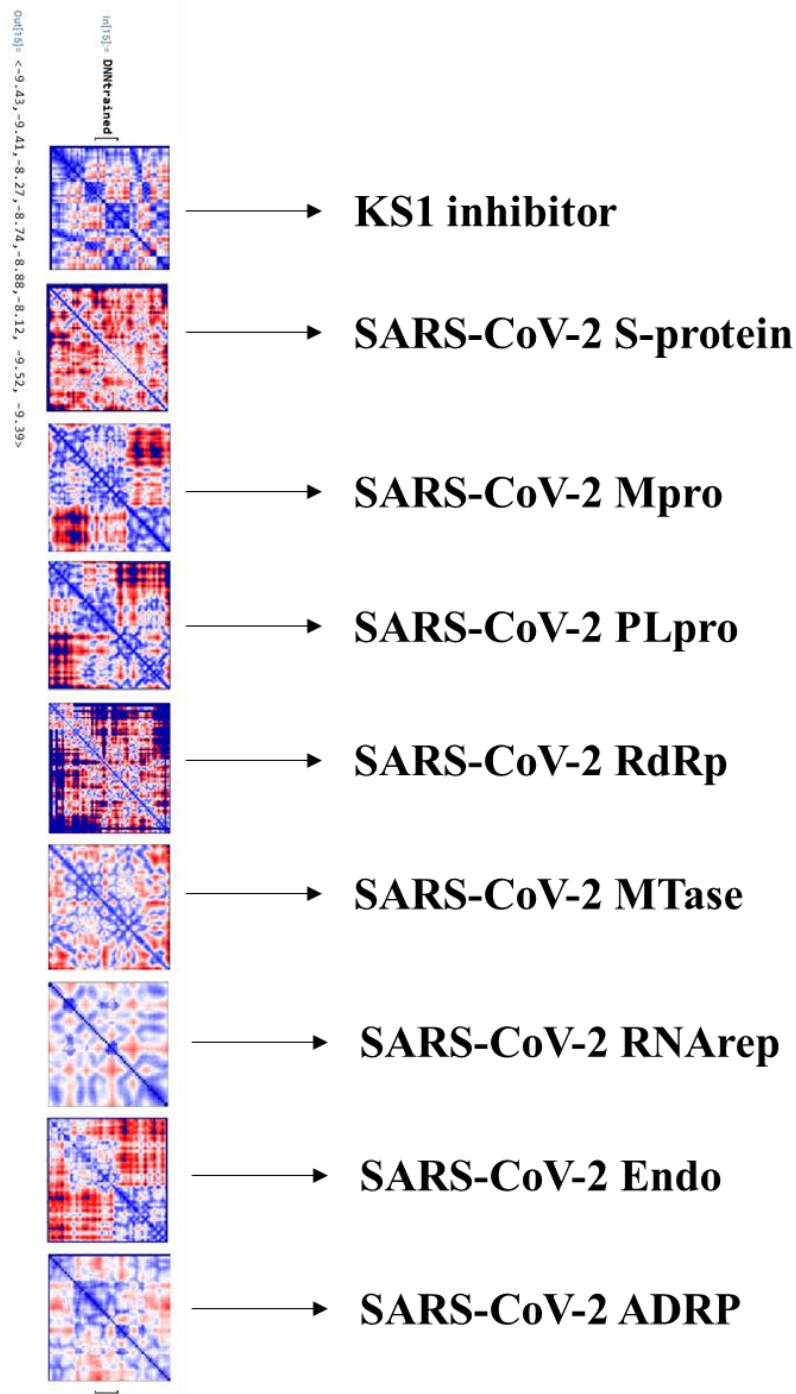

**Figure S7.** An example of the optimum DNN-output or METEORITE-PROOF score of KS1 compound inhibiting on SARS-CoV-2 s-protein, Mpro, PLpro, RdRp, MTase, RNAREP, Endo, and ADRP.

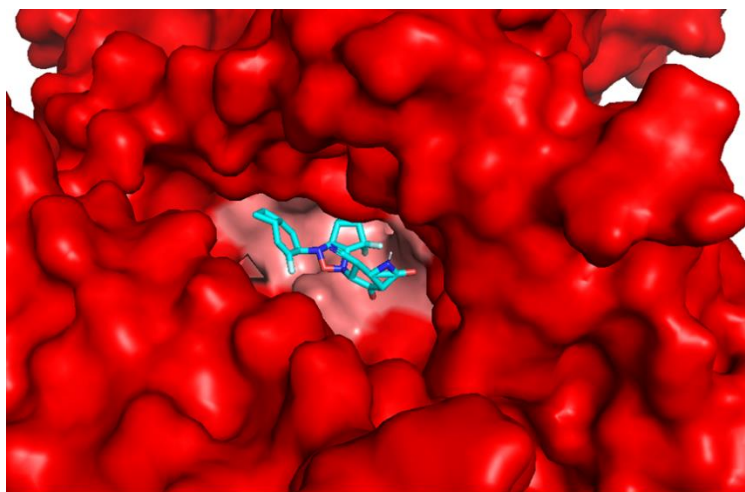

5 Å

**Figure S8.** Zoomed-in simulated **KS2** compound transported into a S-protein pocket gate within 5Å radius.

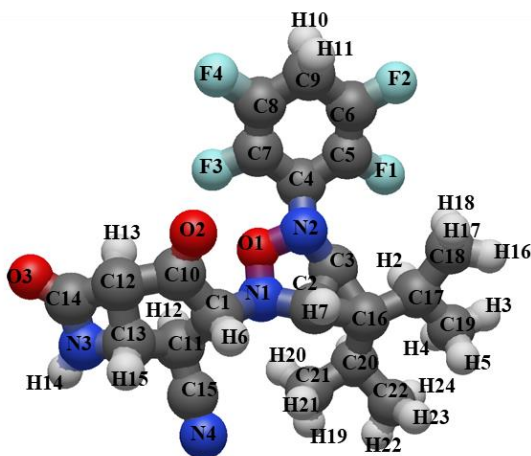

Nonbonded parameters for all atom types simulated in the molecular dynamic simulation.

| Located atom | Atomic number | Mass    | $\sigma$ (nm) | $\epsilon$ (kJ/mol) |
|--------------|---------------|---------|---------------|---------------------|
| CR           | 6             | 12.011  | 0.387541      | 0.23012             |
| NR           | 7             | 14.0067 | 0.329632      | 0.8368              |
| OR           | 8             | 12.011  | 0.315378      | 0.636386            |
| C=C          | 6             | 15.9994 | 0.372396      | 0.284512            |
| CE4R         | 6             | 12.011  | 0.370614      | 0.284512            |
| CR4R         | 6             | 18.9984 | 0.333196      | 0.589944            |
| F            | 9             | 12.011  | 0.290433      | 0.56484             |
| C=O          | 6             | 12.011  | 0.356359      | 0.46024             |
| NC=O         | 7             | 14.0067 | 0.329632      | 0.8368              |
| O=C          | 8             | 15.9994 | 0.302905      | 0.50208             |
| CSP          | 6             | 12.011  | 0.370614      | 0.284512            |
| NSP          | 7             | 14.0067 | 0.329632      | 0.8368              |
| HCMM         | 1             | 1.0079  | 0.235197      | 0.092048            |
| HNCO         | 1             | 1.0079  | 0.040001      | 0.192464            |

Bonded parameters for all atom types simulated in the molecular dynamic simulation.

| Paired atom |      | $d_{eq}$ (nm) | $k_b$ (kJ mol <sup>-1</sup> nm <sup>-2</sup> ) |
|-------------|------|---------------|------------------------------------------------|
| CR          | CR   | 0.338541      | 0.04184                                        |
| CR          | NR   | 0.334087      | 0.187114                                       |
| CR          | OR   | 0.32696       | 0.163176                                       |
| CR          | C=C  | 0.355469      | 0.109105                                       |
| CR          | CE4R | 0.354578      | 0.109105                                       |
| CR          | CR4R | 0.335869      | 0.157109                                       |
| CR          | F    | 0.314487      | 0.15373                                        |
| CR          | C=O  | 0.34745       | 0.138768                                       |
| CR          | NC=O | 0.334087      | 0.187114                                       |
| CR          | O=C  | 0.293997      | 0.144938                                       |
| CR          | CSP  | 0.354578      | 0.109105                                       |
| CR          | NSP  | 0.334087      | 0.187114                                       |
| CR          | HCMM | 0.286869      | 0.062059                                       |
| CR          | HNCO | 0.189271      | 0.089737                                       |
| O=C         | NR   | 0.289542      | 0.648182                                       |
| O=C         | OR   | 0.282415      | 0.565258                                       |
| O=C         | C=C  | 0.310924      | 0.377952                                       |
| O=C         | CE4R | 0.310033      | 0.377952                                       |
| O=C         | CR4R | 0.291324      | 0.544242                                       |
| O=C         | F    | 0.269942      | 0.532536                                       |
| O=C         | C=O  | 0.302905      | 0.480705                                       |
| O=C         | NC=O | 0.289542      | 0.648182                                       |
| O=C         | O=C  | 0.249452      | 0.50208                                        |
| O=C         | CSP  | 0.310033      | 0.377952                                       |
| O=C         | NSP  | 0.289542      | 0.648182                                       |
| O=C         | HCMM | 0.242324      | 0.214978                                       |
| O=C         | HNCO | 0.144726      | 0.310857                                       |

| Triple-atom angle | $k_\theta$ (kJ mol <sup>-1</sup> rad <sup>-2</sup> ) | $\theta_{eq}$ (deg) |
|-------------------|------------------------------------------------------|---------------------|
| N-C-C             | 467.91                                               | 108.2900            |
| C-C-F             | 602.21                                               | 120.0000            |
| C-C-O             | 429.38                                               | 129.4920            |
| N-O-N             | 722.65                                               | 109.5000            |

| Dihedral angles | kJ mol <sup>-1</sup> | $\psi$ |
|-----------------|----------------------|--------|
| C-C-C-F         | 12.0416              | 0      |
| C-C-C-O         | 78.2910              | 0      |
| C-C-C-C         | 6.0250               | 0      |
| N-C-C-H         | -12.0416             | 180    |

**Figure S9.** The atom index in the **KS2** inhibitor with bonded and nonbonded force parameters.

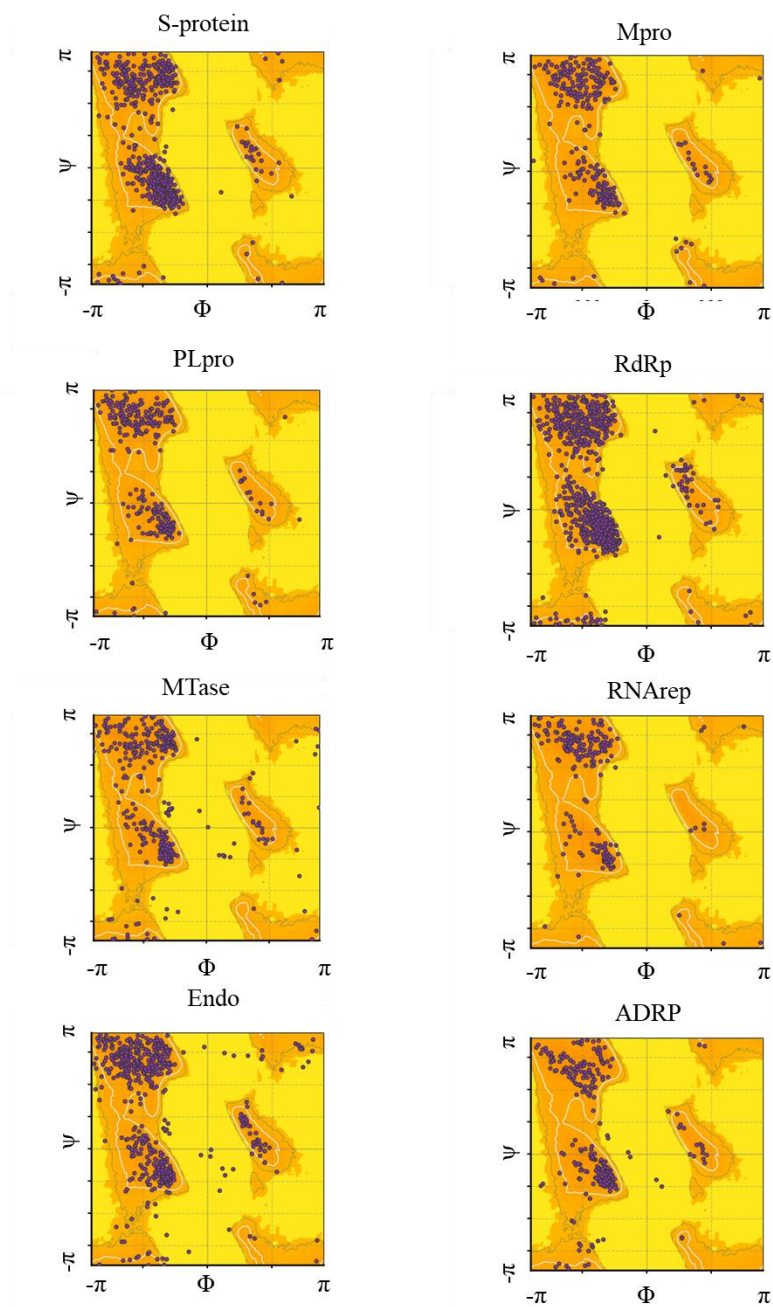

**Figure S10.** Ramachandran diagram illustrating stereochemical geometry of unligated SARS-CoV-2 complex.

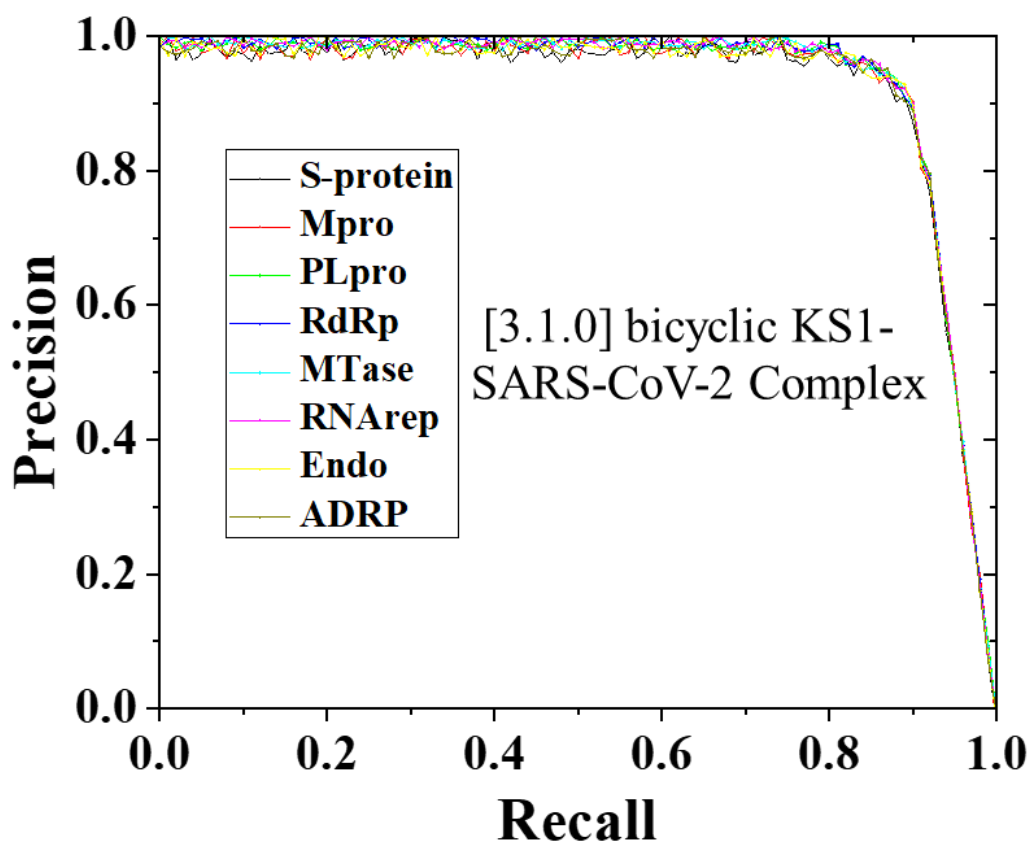

**Figure S11.** Precision-recall plot during allosteric docking classification of [3.1.0] bicyclic KS1 compound inhibiting protein targets using deep learning process for 200 epochs.



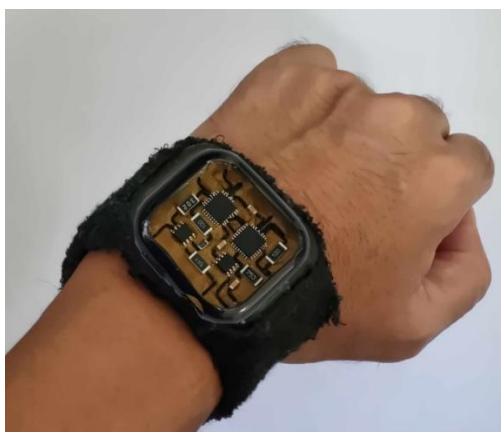

**Figure S12.** Snapshot of wearable lab onchip in accommodating dual microprocessors.

|                         |                                                                                            |
|-------------------------|--------------------------------------------------------------------------------------------|
| <b>(KS1 inhibitor)</b>  | <chem>CC(C)C1(C(C)C)C2C1N(ON2C1C(C#N)C2NC(=O)C2C1=O)C1C(F)=C(F)CC(F)=C1F</chem>            |
| <b>(KS2 inhibitor)</b>  | <chem>FC1=CC2CCC2=C(F)C1N1ON(C2C(C#N)C3NC(=O)C3C2=O)C2C1C1CCC1C2(F)F</chem>                |
| <b>(KS3 inhibitor)</b>  | <chem>CC1CCC(C)C11C2C1N(ON2C1C(C#N)C2NC(=O)C2C1=O)C1C(F)=C(F)CC(F)=C1F</chem>              |
| <b>(KS4 inhibitor)</b>  | <chem>CC(C)C1(C#N)C2C1N(ON2C1C(C#N)C2NC(=O)C2C1=O)C1C(F)=C(F)CC(F)=C1F</chem>              |
| <b>(KS5 inhibitor)</b>  | <chem>CC(C)(C)C1(C2C1N(ON2C1C(C#N)C2NC(=O)C2C1=O)C1C(F)=C(F)CC(F)=C1F)C(C)(C)C</chem>      |
| <b>(KS6 inhibitor)</b>  | <chem>CC1CC(N(C1C)C1OC2OC(NC22C1C2(C)C)C(F)(F)F)C(=O)NC(CC1CCNC1=O)C#N</chem>              |
| <b>(KS7 inhibitor)</b>  | <chem>[H]C12CN(C(C(=O)NC(C3NC3=O)C(=O)C3NS3)C1([H])C2(C)C)C(=O)C(NC(F)=O)C(C)(C)C</chem>   |
| <b>(KS8 inhibitor)</b>  | <chem>[H]C12N(ON(C3CC(F)C(F)C(F)N3)C1([H])C2(C(C)C)C(C)C)C1C(=O)C(=O)N2CNC(C#N)C12N</chem> |
| <b>(KS9 inhibitor)</b>  | <chem>CNC1CC(C=O)C1C(O)NC(=O)N1ON(C2C(F)=C(F)CC(F)=C2F)[C@]23CC[C@]12CC3</chem>            |
| <b>(KS10 inhibitor)</b> | <chem>CCN(C1NC2C(F)C(F)C(F)C2O1)C(=O)C1C(C)CC(C)C1C(=O)C(NC1OC1NC)C#N</chem>               |
| <b>(KS11 inhibitor)</b> | <chem>CCC1C(CC)N(ON1C1C(F)=C(F)CC(F)=C1F)C(=O)NC(O)C1C(CC1C=O)NC</chem>                    |
| <b>(KS12 inhibitor)</b> | <chem>CC(C)C1(C(C)C)C23CC12N(ON3C1C(C#N)C2NC(=O)C2C1=O)C1C(F)=C(F)CC(F)=C1F</chem>         |

**Figure S13:** List of main **KS** inhibitors with their SMILES string output in lab onchip.

### AI-Designing Drugs

### Drug analog

|                                                                                  |     |
|----------------------------------------------------------------------------------|-----|
| <chem>CC(C)C1(C(C)C)C2C1N(ON2C1C(C#N)C2NC(=O)C2C1=O)C1C(F)=C(C)CC(F)=C1F</chem>  | KS1 |
| <chem>CC(C)C1(C(C)C)C2C1N(ON2C1C(C#N)C2NC(=O)C2C1=O)C1C(C)=C(F)CC(F)=C1F</chem>  | KS1 |
| <chem>CC(C)C1(C(C)C)C2C1N(ON2C1C(C#N)C2NC(F)C2C1=O)C1C(O)=C(F)CC(F)=C1F</chem>   | KS1 |
| <chem>CC(C)C1(C(C)C)C2C1N(ON2C1C(C#N)C2NC(F)C2C1=O)C1C(F)=C(O)CC(F)=C1F</chem>   | KS1 |
| <chem>CC(C)C1(C(C)C)C2C1N(ON2C1C(C#N)C2NC(F)C2C1=O)C1C(F)=C(O)CC(O)=C1F</chem>   | KS1 |
| <chem>CC(C)C1(C(C)C)C2C1N(ON2C1C(C#N)C2NC(F)C2C1=O)C1C(O)=C(O)CC(O)=C1F</chem>   | KS1 |
| <chem>CC(C)C1(C(C)C)C2C1N(ON2C1C(F)C2C(NC2=O)C1C#N)C1C(O)=C(F)CC(F)=C1F</chem>   | KS1 |
| <chem>CC(C)C1(C(C)C)C2C1N(ON2C1C(F)C2C(NC2=O)C1C#N)C1C(O)=C(F)CC(O)=C1F</chem>   | KS1 |
| <chem>CC(C)C1(C(C)C)C2C1N(ON2C1C(F)C2C(NC2=O)C1C#N)C1C(O)=C(O)CC(F)=C1O</chem>   | KS1 |
| <chem>CC(C)C1(C(C)C)C2C1N(CN2C1C(C#N)C2NC(=O)C2C1=O)C1C(F)=C(F)CC(F)=C1F</chem>  | KS1 |
| <chem>OC1=C2CCC2C=C(F)C1N1ON(C2C(C#N)C3NC(=O)C3C2=O)C2C1C1CCC1C2(F)F</chem>      | KS2 |
| <chem>OC1=CC2CCC2=C(O)C1N1ON(C2C(C#N)C3NC(=O)C3C2=O)C2C1C1CCC1C2(F)F</chem>      | KS2 |
| <chem>OC1=CC2CCC2=C(O)C1N1ON(C2C(C#N)C3NC(=O)C3C2=O)C2C1C1CCC1C2(F)F</chem>      | KS2 |
| <chem>CC1CC2C=C(F)C(N3ON(C4C(C#N)C5NC(=O)C5C4=O)C4C3C3CCC3C4(F)F)C(O)=C12</chem> | KS2 |
| <chem>OC1(F)C2CCC2C2C1N(ON2C1C(F)=CC2CCC2=C1F)C1C(C#N)C2NC(=O)C2C1=O</chem>      | KS2 |
| <chem>(O)C2CCC2C2C1N(ON2C1C(F)=CC2CCC2=C1F)C1C(C#N)C2NC(=O)C2C1=O</chem>         | KS2 |
| <chem>FC1C2C(NC2=O)C(C#N)C1N1ON(C2C3CCC3C(F)(F)C12)C1C(F)=CC2CCC2=C1F</chem>     | KS2 |
| <chem>FC1NC2C1C(=O)C(C2C#N)N1ON(C2C3CCC3C(F)(F)C12)C1C(F)=CC2CCC2=C1F</chem>     | KS2 |
| <chem>FC1=CC2CCC2=C(F)C1N1CN(C2C(C#N)C3NC(=O)C3C2=O)C2C1C1CCC1C2(F)F</chem>      | KS2 |
| <chem>FC1=CC2CCC2=C(F)C1N1ON(C2C(C#N)C3=NC(=O)C3C2=O)C2C1C1CCC1C2(F)F</chem>     | KS2 |
| <chem>CC1CCC(C)C11C2C1N(ON2C1C(C#N)C2NC(=O)C2C1=O)C1C(O)=C(F)CC(F)=C1F</chem>    | KS3 |
| <chem>CC1CCC(C)C11C2C1N(ON2C1C(C#N)C2NC(=O)C2C1=O)C1C(O)=C(O)CC(F)=C1F</chem>    | KS3 |
| <chem>CC1CCC(C)C11C2C1N(ON2C1C(C#N)C2NC(=O)C2C1=O)C1C(O)=C(O)CC(O)=C1F</chem>    | KS3 |
| <chem>CC1CCC(F)C11C2C1N(ON2C1C(C#N)C2NC(=O)C2C1=O)C1C(F)=C(C)CC(F)=C1F</chem>    | KS3 |
| <chem>CC1=C(C)C(N2ON(C3C2C32C(F)CCC2F)C2C(C#N)C3NC(=O)C3C2=O)C(F)=C(F)C1</chem>  | KS3 |
| <chem>CC1CCC(C)C11C2C1N(ON2C1C(C#N)C2NC(F)C2C1=O)C1C(O)=C(F)CC(F)=C1F</chem>     | KS3 |
| <chem>CC1CCC(C)C11C2C1N(ON2C1C(F)C2C(F)NC2C1C#N)C1C(O)=C(O)CC(F)=C1F</chem>      | KS3 |
| <chem>CC1CCC(C)C11C2C1N(CN2C1C(C#N)C2NC(=O)C2C1=O)C1C(F)=C(F)CC(F)=C1F</chem>    | KS3 |
| <chem>CC1CCC(C)C11C2C1N(ON2C1C(C=N)C2NC(=O)C2C1=O)C1C(F)=C(F)CC(F)=C1F</chem>    | KS3 |
| <chem>CC1CCC(C)C11C2C1N(ON2C1C(C#N)C2=NC(=O)C2C1=O)C1C(F)=C(F)CC(F)=C1</chem>    | KS3 |
| <chem>CC(C)C1(C#N)C2C1N(ON2C1C(C#N)C2NC(=O)C2C1=O)C1C(O)=C(F)CC(F)=C1F</chem>    | KS4 |
| <chem>CC(C)C1(C#N)C2C1N(ON2C1C(C#N)C2NC(=O)C2C1=O)C1C(O)=C(F)CC(O)=C1F</chem>    | KS4 |
| <chem>CC(C)C1(C=N)C2C1N(ON2C1C(C#N)C2NC(=O)C2C1=O)C1C(F)=C(F)CC(F)=C1F</chem>    | KS4 |
| <chem>OC1=C(F)C(N2ON(C3C2C3(C#N)C(F)F)C2C(C#N)C3NC(=O)C3C2=O)C(O)=C(F)C1</chem>  | KS4 |
| <chem>CC(C)C1(C#N)C2C1N(ON2C1C(O)C2C(NC2=O)C1C#N)C1C(F)=C(F)CC(F)=C1F</chem>     | KS4 |
| <chem>CC(C)C1(C#N)C2C1N(ON2C1C(C#N)C2NC(O)C2C1=O)C1C(F)=C(F)CC(F)=C1F</chem>     | KS4 |
| <chem>CC1=C(F)C(N2ON(C3C2C3(C#N)C(F)F)C2C(C#N)C3NC(=O)C3C2=O)C(C)=C(F)C1</chem>  | KS4 |
| <chem>CC(F)C1(C#N)C2C1N(ON2C1C(C#N)C2NC(=O)C2C1=O)C1C(C)=C(F)CC(F)=C1F</chem>    | KS4 |

CCC1(C2C1N(ON2C1C(C#N)C2NC(=O)C2C1=O)C1C(F)=C(F)CC(F)=C1F)C(C)=N KS4  
 CC(C)C1(C#N)C2C1N(CN2C1C(C#N)C2NC(=O)C2C1=O)C1C(F)=C(F)CC(F)=C1F KS4  
 CC1=C(F)C(N2ON(C3C2C3(C#N)C(C)(C)F)C2C(C#N)C3NC(=O)C3C2=O)C(F)=C(F)C1 KS5  
 CC1=C(C)C(N2ON(C3C2C3(C#N)C(C)(F)F)C2C(C#N)C3NC(=O)C3C2=O)C(F)=C(F)C1 KS5  
 CC1=C(C)C(N2ON(C3C2C3(C#N)C(F)(F)F)C2C(C#N)C3NC(=O)C3C2=O)C(C)=C(F)C1 KS5  
 CC1=C(C)C(N2ON(C3C2C3(C#N)C(F)(F)F)C2C(F)C3C(NC3=O)C2C#N)C(C)=C(O)C1 KS5  
 CC1=C(C)C(N2ON(C3C2C3(C#N)C(F)(F)F)C2C(F)C3C(NC3=O)C2C#N)C(C)=C(O)C1 KS5  
 CC1=C(C)C(N2ON(C3C2C3(C#N)C(F)(F)F)C2C(F)C3C(NC3=O)C2C#N)C(C)=C(O)C1 KS5  
 CC1=C(C)C(N2ON(C3C2C3(C#N)C(F)(F)F)C2C(F)C3C(=O)N=C3C2C#N)C(C)=C(O)C1 KS5  
 CC1=C(C)C(N2ON(C3C2C3(CF)C(N)(F)F)C2C(F)C3C(=O)N=C3C2C#N)C(C)=C(O)C1 KS5  
 CC1=C(C)C(N2ON(C3C2C3(CF)C(N)(F)F)C2C(F)C3C(=O)N=C3C2C#N)C(C)=C(O)C1 KS5  
 CC1=C(C)C(N2ON(C3C2C3(CF)C(N)(F)F)C2C(C#N)C3NC(=O)C3C2=O)C(C)=C(O)C1 KS5  
 CC1=C(F)CC(F)=C(F)C1N1ON(C2C1C2(C(C)(C)C)C(C)(C)F)C1C(C#N)C2NC(=O)C2C1=O KS6  
 CC1=C(C)C(N2ON(C3C2C3(C(C)(C)C)C(C)(F)F)C2C(C#N)C3NC(=O)C3C2=O)C(F)=C(F)C1 KS6  
 CC1=C(C)C(N2ON(C3C2C3(C(C)(C)C)C(F)(F)F)C2C(C#N)C3NC(=O)C3C2=O)C(F)=C(C)C1 KS6  
 CC1=C(C)C(N2ON(C3C2C3(C(C)(C)C)C(F)(F)F)C2C(C#N)C3NC(=O)C3C2=O)C(C)=C(C)C1 KS6  
 CC1=C(C)C(N2ON(C3C2C3(C(C)(O)F)C(F)(F)F)C2C(C#N)C3NC(=O)C3C2=C)C(C)=C(C)C1 KS6  
 CC1=C(C)C(N2ON(C3C2C3(C(C)(O)O)C(F)(F)F)C2C(C#N)C3NC(F)C3C2=C)C(C)=C(C)C1 KS6  
 CC1=C(C)C(N2CN(C3C2C3(C(C)(F)F)C(O)(O)O)C2C(F)C3C(F)NC3C2C#N)C(C)=C(C)C1 KS6  
 CC1=C(C)C(N2CN(C3C2C3(C(C)(C)F)C(O)(O)O)C2C(F)C3C(F)NC3C2C#N)C(C)=C(C)C1 KS6  
 CC1NC2C1C(F)C(C2C#N)N1CN(C2C1C2(C(C)(C)F)C(O)(O)O)C1C(C)=C(C)CC(F)=C1C KS6  
 CC1CC(N(C1C)C1OC2CC(NC22C1C2(C)C)C(F)(F)F)C(=O)NC(CC1CCNC1=O)C#N KS7  
 CC1CC(N(C1C)C1CC2CC(NC22C1C2(C)C)C(F)(F)F)C(=O)NC(CC1CCNC1=O)C#N KS7  
 CC1CC2CC(C3C(F)(F)C23N1)N1C(C)C(C)CC1C(=O)NC(CC1CCNC1=O)C#N KS7  
 CC1CC2CC(C3C(C)(F)C23N1)N1C(F)C(C)CC1C(=O)NC(CC1CCNC1=O)C#N KS7  
 CC1CC2CC(C3C(C)(C)C23N1)N1C(F)C(F)CC1C(=O)NC(CC1CCNC1=O)C#N KS7  
 CC1CC2OC(C3C(C)(C)C23N1)N1C(F)C(F)CC1C(=O)NC(CC1CCNC1=O)C#N KS7  
 CC1NC23C(C(OC2O1)N1C(F)C(F)CC1C(=O)NC(CC1CCNC1=O)C#N)C3(C)C KS7  
 CC1NC23C(C(OC2O1)N1C(F)C(F)CC1C(O)NC(CC1CCNC1=O)C#N)C3(C)C KS7  
 CC1NC23C(C(OC2O1)N1C(F)C(O)CC1C(O)NC(CC1CCNC1F)C#N)C3(C)C KS7  
 CC(NC(CC1CCNC1F)C#N)C1CC(O)C(F)N1C1OC2OC(C)NC22C1C2(C)O KS7  
 [H]C12CN(C(C(=O)NC(C3NC3=O)C(=O)C3NS3)C1([H])C2(C)C)C(=O)C(NC(C)=O)C(C)(C)F KS8  
 [H]C12C(N(CC1(F)C2(C)C)C(=O)C(NC(C)=O)C(C)(C)C)C(=O)NC(C1NC1=O)C(=O)C1NS1 KS8  
 [H]C12CN(C(C(=O)NC(C3NC3=O)C(=O)C3NS3)C1(F)C2(C)C)C(=O)C(NC(C)=O)C(C)(C)C KS8  
 [H]C12CN(C(C(=O)NC(C3NC3=O)C(=O)C3NS3)C1([H])C2(C)F)C(=O)C(NC(C)=O)C(C)(C)C KS8  
 [H]C12CN(C(C(=O)NC(C(F)C3NS3)C3NC3=O)C1([H])C2(C)O)C(=O)C(NC(C)=O)C(C)(C)C KS8  
 [H]C12CN(C(C(=O)NC(C3NC3=O)C(=O)C3NS3)C1([H])C2(C)C)C(=O)C(NC(O)F)C(C)(C)C KS8  
 [H]C12CN(C(O)C(NC(O)F)C(C)(C)C)C(=O)NC(C3NC3=O)C(=O)C3NS3)C1([H])C2(C)C KS8  
 [H]C12CN(C(O)C(NC(O)F)C(C)(C)C)C(O)NC(C3NC3O)C(=O)C3NS3)C1([H])C2(C)C KS8  
 [H]C12CN(C(O)C(NC(O)F)C(C)(C)C)C(O)NC(C(O)C3NS3)C3NC3O)C1([H])C2(C)C KS8  
 [H]C12N(ON(C3CC(C)C(F)C(F)N3)C1([H])C2(C)C)C(C)C1C(=O)C(=O)N2CNC(C#N)C12N KS9

[H]C12N(ON(C3CC(F)C(C)C(F)N3)C1([H])C2(C(C)C)C(C)C)C1C(=O)C(=O)N2CNC(C#N)C12N KS9  
[H]C12N(ON(C3CC(F)C(F)C(C)N3)C1([H])C2(C(C)C)C(C)C)C1C(=O)C(=O)N2CNC(C#N)C12N KS9  
[H]C12N(ON(C3CC(C)C(F)C(F)N3)C1([H])C2(C(C)C)C(C)F)C1C(=O)C(=O)N2CNC(C#N)C12N KS9  
[H]C12N(ON(C3CC(C)C(C)C(F)N3)C1([H])C2(C(C)C)C(F)F)C1C(=O)C(=O)N2CNC(C#N)C12N KS9  
[H]C12N(ON(C3CC(C)C(C)C(C)N3)C1([H])C2(C(C)F)C(F)F)C1C(=O)C(=O)N2CNC(C#N)C12N KS9  
[H]C12N(CN(C3CC(C)C(C)C(C)N3)C1([H])C2(C(O)F)C(F)F)C1C(=O)C(=O)N2CNC(C#N)C12N KS9  
[H]C12N(CN(C3C(=O)C(=O)N4CNC(C#N)C34N)C1(O)C2(C(C)F)C(F)F)C1CC(C)C(C)C)N1 KS9  
[H]C12N(CN(C3CC(C)C(C)C(C)N3)C1(O)C2(C(C)F)C(F)F)C1C(=O)C(=O)N2CNC(C#N)C12N KS9  
[H]C12N(CN(C3CC(C)C(O)C(C)N3)C1([H])C2(C(C)F)C(F)F)C1C(=O)C(=O)N2CNC(C#N)C12N KS9  
CNC1CC(C=O)C1C(F)NC(=O)N1ON(C2C(O)=C(F)CC(F)=C2F)[C@]23CC[C@]12CC3 KS10  
CNC1CC(C=O)C1C(F)NC(=O)N1ON(C2C(O)=C(F)CC(F)=C2F)[C@]23CC[C@]12CC3 KS10  
CNC1CC(C=O)C1C(F)NC(=O)N1ON(C2C(F)=C(O)CC(F)=C2F)[C@]23CC[C@]12CC3 KS10  
CNC1CC(CO)C1C(F)NC(=O)N1ON(C2C(F)=C(O)CC(F)=C2F)[C@]23CC[C@]12CC3 KS10  
CNC1CC(F)C1C(=O)NC(=O)N1ON(C2C(F)=C(O)CC(F)=C2F)[C@]23CC[C@]12CC3 KS10  
CNC1CC(C)C1C(=O)NC(O)N1ON(C2C(F)=C(F)CC(F)=C2F)[C@@]23CC[C@@]12CC3 KS10  
CNC1CC(C)C1C(O)NC(O)N1ON(C2C(F)=C(F)CC(F)=C2F)[C@@]23CC[C@@]12CC3 KS10  
CNC1CC(C)C1C(O)NC(O)N1ON(C2C(F)=C(C)CC(F)=C2F)[C@@]23CC[C@@]12CC3 KS10  
CNC1CC(C)C1C(O)NC(O)N1ON(C2C(C)=C(C)CC(F)=C2F)[C@@]23CC[C@@]12CC3 KS10  
CNC1CC(F)C1C(O)NC(O)N1ON(C2C(C)=C(C)CC(F)=C2F)[C@@]23CC[C@@]12CC3 KS10  
CNC1OC1NC(C#N)C(=O)C1C(C)CC(C)C1C(=O)N(CF)C1NC2C(F)C(F)C(C)C2O1 KS11  
CCN(C1NC2C(F)C(F)C(C)C2O1)C(=O)C1C(F)CC(C)C1C(=O)C(NC1OC1NC)C#N KS11  
CCN(C1NC2C(F)C(F)C(C)C2O1)C(=O)C1C(C)CC(F)C1C(=O)C(NC1OC1NC)C#N KS11  
CCN(C1NC2C(F)C(F)C(C)C2O1)C(=O)C1C(C)CC(C)C1C(=O)C(NC1OC1NF)C#N KS11  
CCN(C1NC2C(F)C(F)C(F)C2O1)C(=O)C1C(C)CC(O)C1C(=O)C(NC1CC1NC)C#N KS11  
CCN(C1NC2C(F)C(F)C(F)C2O1)C(=O)C1C(C)CC(O)C1C(=O)C(NC1CC1NC)C#N KS11  
CCNC1CC1NC(C#N)C(=O)C1C(C)CC(C)C1C(=O)N(CO)C1NC2C(F)C(F)C(F)C2O1 KS11  
CCNC1CC1NC(C#N)C(=O)C1C(C)CC(C)C1C(=O)N(CO)C1NC2C(F)C(F)C(F)C2O1 KS11  
CCN(C1NC2C(O)C(F)C(F)C2O1)C(=O)C1C(O)CC(C)C1C(=O)C(NC1CC1NC)C#N KS11  
CCN(C1NC2C(O)C(F)C(F)C2O1)C(=O)C1C(C)CC(O)C1C(=O)C(NC1CC1NC)C#N KS11  
CCC1C(CC)N(ON1C1C(C)=C(F)CC(F)=C1F)C(=O)NC(O)C1C(CC1C=O)NC KS12  
CCC1C(CC)N(ON1C1C(F)=C(C)CC(F)=C1F)C(=O)NC(O)C1C(CC1C=O)NC KS12  
CCC1C(CC)N(ON1C1C(F)=C(C)CC(F)=C1F)C(=O)NC(O)C1C(CC1C=O)NC KS12  
CCC1C(CF)N(ON1C(=O)NC(O)C1C(CC1C=O)NC)C1C(C)=C(F)CC(F)=C1F KS12  
CCC1C(CF)N(ON1C1C(C)=C(F)CC(F)=C1F)C(=O)NC(O)C1C(CC1C=O)NC KS12  
CCC1C(CC)N(ON1C1C(C)=C(F)CC(F)=C1F)C(=O)NC(O)C1C(CC1C=O)NF KS12  
CCC1C(CC)N(ON1C1C(C)=C(F)CC(F)=C1F)C(=O)NC(O)C1C(CC1C=O)NF KS12  
CCC1C(CC)N(ON1C1C(F)=C(F)CC(F)=C1F)C(=O)NC(O)C1C(CC1=N)C=O KS12  
CCC1C(CC)N(ON1C1C(F)=C(F)CC(F)=C1F)C(=O)NC(O)C1C(N)CC1CO KS12  
CCC1C(CC)N(ON1C(O)NC(O)C1C(N)CC1CO)C1C(F)=C(F)CC(F)=C1F KS12  
CCC1C(CC)N(CN1C(O)NC(O)C1C(N)CC1CO)C1C(F)=C(F)CC(F)=C1F KS13  
CC(C)C1(C(C)C)C23CC12N(ON3C1C(C#N)C2NC(=O)C2C1=O)C1C(C)=C(C)CC(F)=C1C KS13  
CC(C)C1(C(C)C)C23CC12N(ON3C1C(C#N)C2NC(=O)C2C1=O)C1C(C)=C(C)CC(F)=C1F KS13  
CC(C)C1(C(C)C)C23CC12N(ON3C1C(C#N)C2NC(=O)C2C1=O)C1C(F)=C(C)CC(F)=C1F KS13

|                                                                                      |      |
|--------------------------------------------------------------------------------------|------|
| <chem>CC(C)C1(C(C)F)C23CC12N(ON3C1C(C#N)C2NC(=O)C2C1=O)C1C(C)=C(F)CC(F)=C1F</chem>   | KS13 |
| <chem>CC(F)C1(C(F)F)C23CC12N(ON3C1C(C#N)C2NC(=O)C2C1=O)C1C(C)=C(C)CC(C)=C1F</chem>   | KS13 |
| <chem>CC1=C(C)C(N2ON(C3C(C#N)C4NC(=O)C4C3=O)C34CC23C4(C(F)F)C(F)F)C(C)=C(C)C1</chem> | KS13 |
| <chem>CC1=C(C)C(N2ON(C3C(C#N)C4NC(O)C4C3=O)C34CC23C4(C(F)F)C(F)F)C(C)=C(C)C1</chem>  | KS13 |
| <chem>CC1=C(C)C(N2ON(C3C(O)C4C(O)NC4C3C#N)C34CC23C4(C(F)F)C(F)F)C(C)=C(C)C1</chem>   | KS13 |
| <chem>CC1=C(C)C(N2ON(C3C(O)C4C(O)N=C4C3C#N)C34CC23C4(C(F)F)C(F)F)C(C)=C(C)C1</chem>  | KS13 |

**Figure S14:** List of main KS inhibiting analogs with their SMILES string output in the lab-on-a-chip.

**Video S1:** Simulated [3.1.0] bicyclic **KS1** inhibitor (RO5 with less than 10 rotational bonds) bound to allosteric sites of SARS-CoV-2 RNA replicase.

**Video S2:** Simulated [4.2.0] tricyclic **KS2** inhibitor bound to active dyad of SARS-CoV-2 main protease.

**Video S3:** Demonstration of lab-on-a-chip activation.
